# Supplementary material for: Lower selfing rates in metallicolous populations than in non-metallicolous populations of the pseudometallophyte Noccaea caerulescens (Brassicaceae) in Southern France
Source: PubMed Central journal article supplement (PMC4765546; doi:10.1093/aob/mcv191), 2016-01-15
Supplement: supp_mcv191_mcv191_Supplementary-data.pdf [file supp_mcv191_mcv191_Supplementary-data.pdf]

## SUPPLEMENTARY DATA

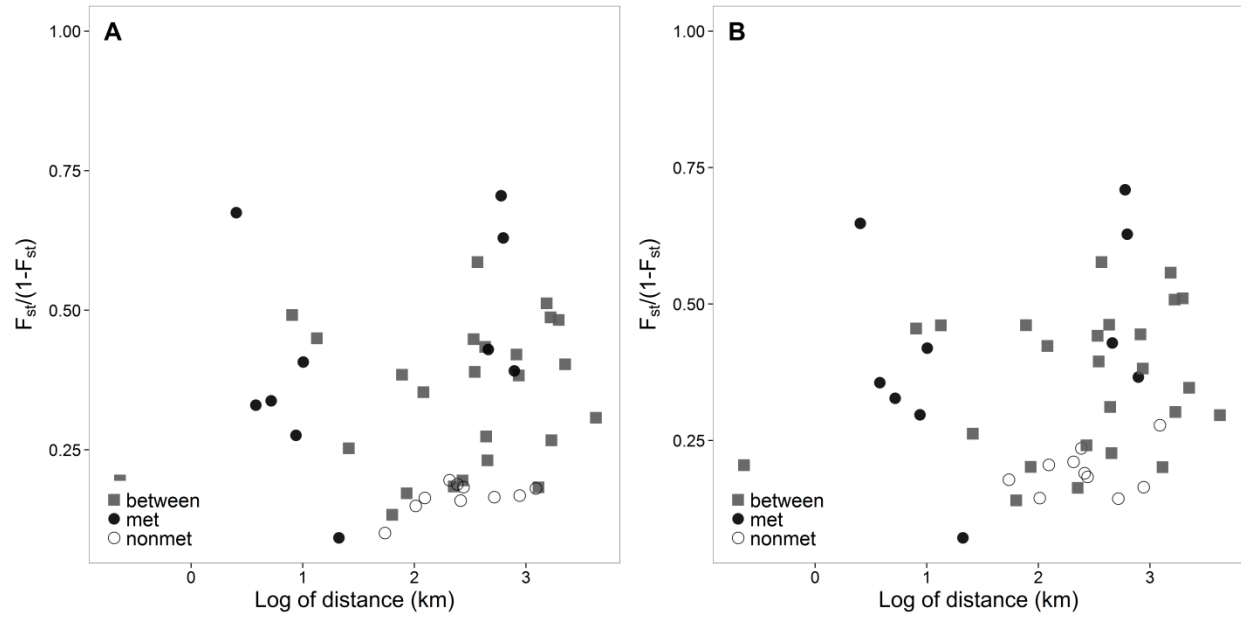

FIG. S1. Regression of the pairwise  $F_{st}/(1 - F_{st})$  in both years on the logarithm of the geographic distances between populations of *Noccaea caerulea*. Light grey, between ecotype; medium grey, among metallicolous populations; dark grey, among nonmetallicolous populations; (A) 2012; (B) 2013. Slopes were not significantly different from zero.

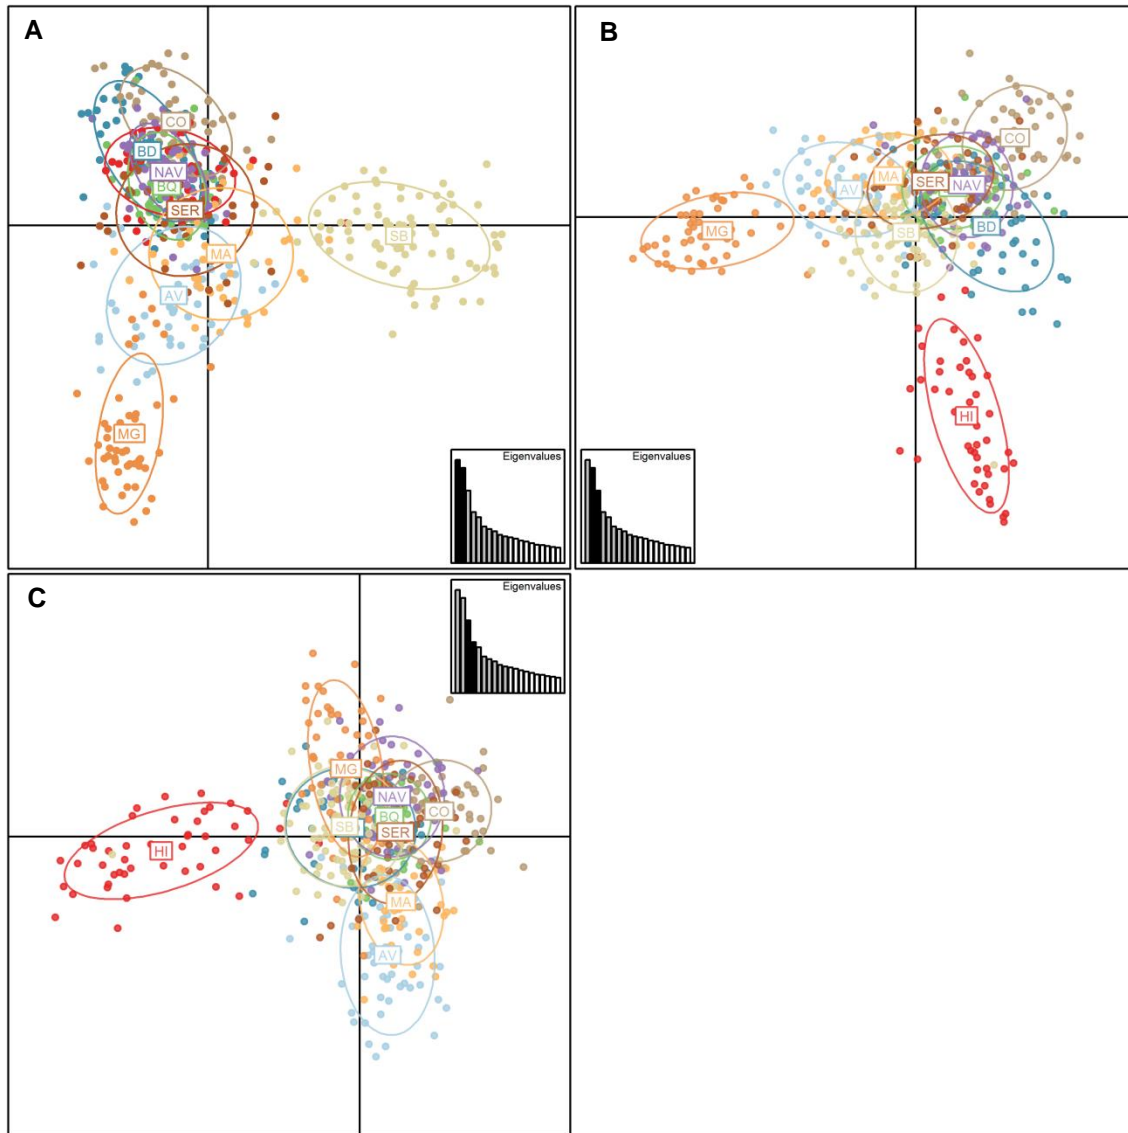

FIG. S2. Projection of individuals in the principal components plane of a principal components analysis in *Noccaea caerulea*. (A) First and second principal components. (B) Second and third principal components. (C) Third and fourth principal components. Colours represent different populations. Corners: screeplot of eigenvalues associated with each component. Plots from 2013 sampling are not shown as they were extremely similar to those of 2012. AV, Avinières; BD, Saint Baudille; BQ, Baraquette; CO, Coulet; HI, Saint Hippolyte; MA, Malines; MG, Moyen-Âge; Pop, populations ; RT, Route; SE, Séranne.

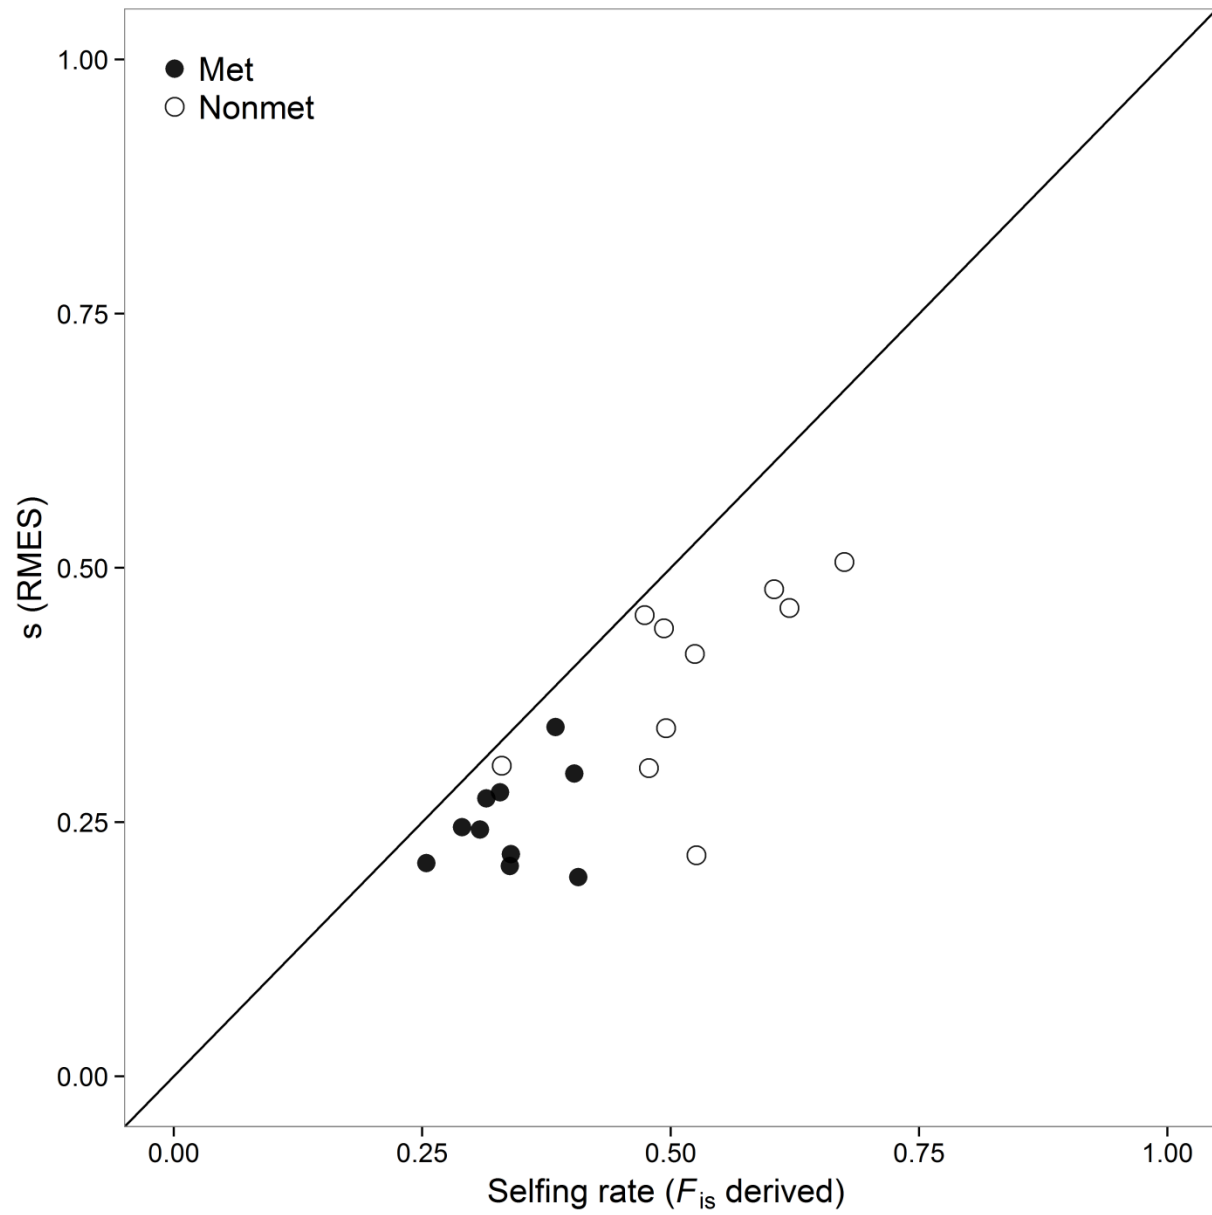

FIG. S3. Correlation between selfing rates of *Noccaea caerulea* derived from  $F_{is}$  and estimated with the RMES method.

TABLE S1. Pairwise  $F_{st}$  between populations of *Noccaea caerulescens*. The bottom left half are estimates from 2012 and right top half are estimates from 2013.

|         |     | MET  |      |      |      |      | NONMET |      |      |      |      |
|---------|-----|------|------|------|------|------|--------|------|------|------|------|
| Ecotype | Pop | AV   | HI   | MA   | MG   | SB   | BD     | BQ   | CO   | RT   | SE   |
| MET     | AV  |      | 0.30 | 0.07 | 0.26 | 0.30 | 0.23   | 0.21 | 0.24 | 0.18 | 0.17 |
|         | HI  | 0.30 |      | 0.27 | 0.42 | 0.39 | 0.23   | 0.31 | 0.34 | 0.26 | 0.28 |
|         | MA  | 0.08 | 0.28 |      | 0.25 | 0.23 | 0.17   | 0.17 | 0.19 | 0.14 | 0.12 |
|         | MG  | 0.25 | 0.41 | 0.25 |      | 0.39 | 0.36   | 0.31 | 0.37 | 0.31 | 0.32 |
|         | SB  | 0.29 | 0.39 | 0.22 | 0.40 |      | 0.34   | 0.32 | 0.32 | 0.28 | 0.30 |
| NONMET  | BD  | 0.21 | 0.24 | 0.15 | 0.34 | 0.33 |        | 0.22 | 0.16 | 0.13 | 0.14 |
|         | BQ  | 0.20 | 0.30 | 0.15 | 0.33 | 0.31 | 0.15   |      | 0.19 | 0.17 | 0.15 |
|         | CO  | 0.22 | 0.33 | 0.16 | 0.37 | 0.30 | 0.14   | 0.16 |      | 0.13 | 0.17 |
|         | RT  | 0.19 | 0.29 | 0.16 | 0.31 | 0.28 | 0.14   | 0.16 | 0.13 |      | 0.15 |
|         | SE  | 0.15 | 0.28 | 0.12 | 0.28 | 0.26 | 0.14   | 0.09 | 0.14 | 0.15 |      |

AV, Avinières; BD, Saint Baudille; BQ, Baraquette; CO, Coulet; HI, Saint Hippolyte; MA, Malines; MET, metallicolous populations ; NONMET, nonmetallicolous populations ; MG, Moyen-Âge; Pop, populations ; RT, Route; SE, Séranne.
